# Supplementary material for: Poly(norbornene) anion conductive membranes: homopolymer, block copolymer and random copolymer properties and performance
Source: Royal Society of Chemistry journal article supplement (doi:10.1039/d0ta04756b), 2020-01-01
Supplement: d0ta04756b1.pdf [file d0ta04756b1.pdf]

## Supporting Information

### **Poly(norbornene) Anion Conductive Membranes: Homopolymer, Block Copolymer and Random Copolymer Properties and Performance**

Mrinmay Mandal,<sup>1</sup> Garrett Huang,<sup>1</sup> Noor Ul Hassan<sup>2</sup>, William E. Mustain<sup>2</sup>, and Paul A. Kohl<sup>\*1</sup>

<sup>1</sup>School of Chemical and Biomolecular Engineering, Georgia Institute of Technology, Atlanta, GA

<sup>2</sup>Department of Chemical Engineering, University of South Carolina, Columbia, SC

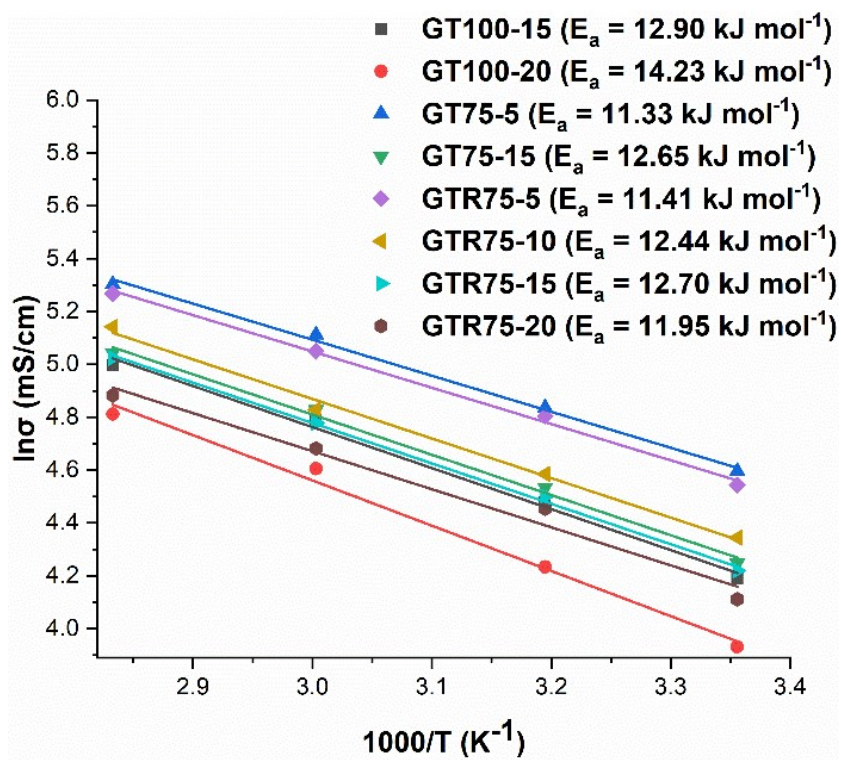

**Fig. S1.** Arrhenius plot of  $\ln(\sigma)$  vs. inverse temperature of polynorbornene AEMs. The standard error for the measurements was  $\pm 0.1 \text{ kJ/mol}$ .
